# Supplementary material for: Clearance of persistent SARS-CoV-2 associates with increased neutralizing antibodies in advanced HIV disease post-ART initiation
Source: PubMed Central journal article supplement (PMC10943233; doi:10.1038/s41467-024-46673-2), 2024-03-15
Supplement: 41467_2024_46673_MOESM1_ESM.pdf [file 41467_2024_46673_MOESM1_ESM.pdf]

## Supplementary Material

### **Clearance of persistent SARS-CoV-2 associates with increased neutralizing antibodies in advanced HIV disease post-ART initiation**

Karim et al.

#### Contents

|                                                                                                                                 |    |
|---------------------------------------------------------------------------------------------------------------------------------|----|
| Table S1: Participants enrolled in the study .....                                                                              | 2  |
| Table S2: Participants for calculating infection period .....                                                                   | 2  |
| Table S3: Advanced HIV disease participants vaccinated during study .....                                                       | 2  |
| Table S4: Control participants used to measure T cell responses .....                                                           | 3  |
| Table S5: Advanced HIV participants used to measure T cell responses .....                                                      | 3  |
| Table S6: Pfizer-vaccinated longitudinally tracked control participants .....                                                   | 3  |
| Table S7: Summary vaccinated participants (no advanced HIV disease) .....                                                       | 4  |
| Table S8: Participants from different infection periods .....                                                                   | 4  |
| Figure S1: Antiretroviral drugs detected in plasma samples from the 5 participants with advanced HIV disease. ....              | 5  |
| Figure S2: Substitutions or deletions in SARS-CoV-2 sequences of advanced HIV disease participants through time. ....           | 6  |
| Figure S3: Effect of co-formulated TLD ART regimen on HIV and SARS-CoV-2 infection. ....                                        | 7  |
| Figure S4: Neutralizing antibody response of participant plasma against autologous outgrown virus at different timepoints. .... | 8  |
| Figure S5: Kinetics of antibody isotype responses in plasma over time in advanced HIV disease participants. ....                | 9  |
| Figure S6: Flow cytometry gating strategy and control participant responses. ....                                               | 10 |

**Table S1: Participants enrolled in the study**

|                         | All<br>994       | HIV-<br>n=587 (59%) | HIV Suppressed*<br>CD4** >200<br>n=259 (26%) | HIV viremic<br>CD4** >200<br>n=35 (4%) | HIV<br>viremic/suppressed<br>CD4** <200<br>n=113 (11%) |
|-------------------------|------------------|---------------------|----------------------------------------------|----------------------------------------|--------------------------------------------------------|
| Age (median, IQR)       | 41 (32-52)       | 42 (31-55)          | 42 (35-50)                                   | 34.5 (27-38)                           | 41 (32-47)                                             |
| Female                  | 621 (62%)        | 347 (59%)           | 193 (75%)                                    | 22 (63%)                               | 59 (52%)                                               |
| SuppO2                  | 143 (14%)        | 62 (11%)            | 36 (14%)                                     | 8 (23%)                                | 37 (33%)                                               |
| CD4 count (median, IQR) | 774.5 (467-1035) | 907.5 (676-1149)    | 695 (478-901.5)                              | 433 (283-540)                          | 65 (23-134)                                            |
| Vaccination:            |                  |                     |                                              |                                        |                                                        |
| Not vaccinated          | 493 (50%)        | 253 (43%)           | 127 (49%)                                    | 24 (69%)                               | 89 (79%)                                               |
| 1 dose BNT162b2***      | 32 (3%)          | 18 (3%)             | 10 (4%)                                      | 1 (3%)                                 | 3 (3%)                                                 |
| 1 dose Ad26.COVS.S      | 281 (28%)        | 210 (36%)           | 59 (23%)                                     | 6 (17%)                                | 6 (5%)                                                 |
| 2 doses BNT162b2        | 188 (19%)        | 106 (18%)           | 63 (24%)                                     | 4 (11%)                                | 15 (13%)                                               |
| Variant#:               |                  |                     |                                              |                                        |                                                        |
| Ancestral               | 147 (15%)        | 86 (14%)            | 44 (17%)                                     | 8 (23%)                                | 9 (8%)                                                 |
| Beta                    | 135 (13%)        | 92 (16%)            | 24 (9%)                                      | 4 (11%)                                | 15 (13%)                                               |
| Delta                   | 106 (11%)        | 52 (9%)             | 32 (12%)                                     | 3 (9%)                                 | 19 (16%)                                               |
| Omicron BA.1, BA.2      | 97 (10%)         | 51 (9%)             | 23 (9%)                                      | 3 (9%)                                 | 20 (18%)                                               |
| Omicron BA.5 related    | 53 (5%)          | 22 (4%)             | 14 (6%)                                      | 4 (11%)                                | 13 (12%)                                               |
| Omicron XBB             | 96 (10%)         | 65 (11%)            | 21 (8%)                                      | 2 (6%)                                 | 8 (7%)                                                 |
| No infection (controls) | 360 (36%)        | 219 (37%)           | 101 (39%)                                    | 11 (31%)                               | 29 (26%)                                               |
| Comorbidities:          |                  |                     |                                              |                                        |                                                        |
| Diabetes                | 108 (11%)        | 77 (13%)            | 26 (10%)                                     | 1 (3%)                                 | 4 (4%)                                                 |
| Hypertension            | 199 (20%)        | 129 (22%)           | 57 (22%)                                     | 4 (11%)                                | 9 (8%)                                                 |
| Cardiovascular Disease  | 30 (3%)          | 25 (4%)             | 3 (1%)                                       | 0 (0%)                                 | 2 (2%)                                                 |

\*Median HIV viral load < 500. \*\*Median CD4 count. \*\*\*At enrollment. #Variant determined by dominant circulating variant at enrollment.

**Table S2: Participants for calculating infection period**

|                          | Advanced HIV disease | HIV-          |
|--------------------------|----------------------|---------------|
| Number of participants   | 24                   | 24            |
| Age (median, IQR)        | 37 (33-42)           | 37 (33-42)    |
| Female                   | 13 (54%)             | 13 (54%)      |
| Viral Load (median, IQR) | 40237 (5456-106518)  | -             |
| CD4                      | 10 (5-21)            | 833 (614-988) |

**Table S3: Advanced HIV disease participants vaccinated during study**

| Participant | Sex | Age   | Diagnosis | Infec. wave | Enrol. CD4 | Enrol. HIV VL | 1 <sup>st</sup> Vacc. Date | Vacc. CD4 | Vacc. HIV VL | Time to last positive |
|-------------|-----|-------|-----------|-------------|------------|---------------|----------------------------|-----------|--------------|-----------------------|
| 27          | F   | 30-39 | Sep 2020  | D614G       | 6          | 34151         | Sep 2021                   | 92        | 40           | 215                   |
| 96          | M   | 40-49 | Apr 2021  | Beta        | 4          | 111883        | Nov 2021                   | 59        | 40           | 110                   |
| 127         | M   | 30-39 | Mar 2021  | Beta        | 12         | 8581          | Sep 2021                   | 120       | 40           | 207                   |
| 209         | F   | 30-39 | Dec 2021  | Omicron     | 24         | 423817        | Apr 2022                   | 31        | 661666       | 165                   |
| 255         | M   | 20-29 | Sep 2021  | Delta       | 2          | 12041         | Jun-2022                   | 42        | 17813        | 289                   |

**Table S4: Control participants used to measure T cell responses**

| Participant | Time-point (T) | Sex | Age Range | Sample date | Infection date* | Infection to sample (days) | Vaccine date | HIV status | CD4  | CD8 |
|-------------|----------------|-----|-----------|-------------|-----------------|----------------------------|--------------|------------|------|-----|
| 17          | 1              | F   | 60-69     | Aug 20      | Jul 20          | 33                         | Jun 21       | Neg.       | 837  | 472 |
|             | 2              |     |           | Jul 21      |                 | 369                        |              |            | 1025 | 693 |
| 21          | 1              | F   | 30-39     | Aug 20      | Jul 20          | 24                         | Oct 21       | PLWH       | 489  | 529 |
|             | 2              |     |           | Nov 21      |                 | 479                        |              |            | 404  | 319 |
| 103         | 1              | M   | 50-59     | Jul 21      | Jun 21          | 23                         | Feb 21       | Neg.       | 904  | 515 |
|             | 2              |     |           | Mar 22      |                 | 282                        |              |            | 1149 | 640 |
| 95          | 1              | M   | 50-59     | May 21      | Jan 21          | 120                        | Oct 21       | PLWH       | 576  | 990 |
|             | 2              |     |           | Nov 21      |                 | 297                        |              |            | 419  | 853 |
| 109         | 1              | M   | 40-49     | Aug 21      | Aug 21          | 20                         | Oct 21       | PLWH       | 1181 | 572 |
|             | 2              |     |           | Oct 21      |                 | 83                         |              |            | 1072 | 434 |

\*By date of initial SARS-CoV-2 diagnosis.

**Table S5: Advanced HIV participants used to measure T cell responses**

| Participant | Time-point (T) | Sex | Age Range | Sample date | Infection date* | Infection to sample (days) | Infection to clear. (days) | HIV VL | CD4 | CD8  |
|-------------|----------------|-----|-----------|-------------|-----------------|----------------------------|----------------------------|--------|-----|------|
| 27          | 1              | F   | 30-39     | Apr 21      | Sep 20          | 203                        | 232                        | 57     | 19  | 380  |
|             | 2              |     |           | May 21      |                 | 232                        |                            | 49     | 43  | 644  |
| 96          | 1              | M   | 40-49     | Jul 21      | Apr 21          | 99                         | 130                        | 40     | 10  | 333  |
|             | 2              |     |           | Aug 21      |                 | 130                        |                            | 113    | 42  | 941  |
| 127         | 1              | M   | 30-39     | May 21      | Mar 21          | 68                         | 221                        | 821    | 21  | 1180 |
|             | 2              |     |           | Oct 21      |                 | 221                        |                            | 40     | 101 | 1049 |
| 209         | 1              | F   | 30-39     | Apr 22      | Dec 21          | 124                        | 187                        | 661666 | 31  | 170  |
|             | 2              |     |           | Jun 22      |                 | 187                        |                            | 550    | 252 | 797  |
| 255         | 1              | M   | 20-29     | Apr 22      | Sep 21          | 238                        | 293                        | 148    | 54  | 691  |
|             | 2              |     |           | Aug 22      |                 | 364                        |                            | 40     | 16  | 203  |

\*By date of initial SARS-CoV-2 diagnosis.

**Table S6: Pfizer-vaccinated longitudinally tracked control participants**

| Participant | Sex | Age   | Diagnosis | Infection wave | Enrol. CD4 | Enrol. HIV VL | 1 <sup>st</sup> Vacc. Date | Vacc. CD4 | Vacc. HIV VL | Time to last positive |
|-------------|-----|-------|-----------|----------------|------------|---------------|----------------------------|-----------|--------------|-----------------------|
| 9           | F   | 40-49 | Jun 2020  | D614G          | 706        | <40           | Sep 2021                   | 658       | <40          | 25                    |
| 21          | F   | 30-39 | Jul 2020  | D614G          | 663        | <40           | Sep 2021                   | 815       | <40          | 9                     |
| 69          | F   | 40-49 | Aug 2020  | D614G          | 702        | <40           | Sep 2021                   | 757       | <40          | 11                    |
| 123         | F   | 20-29 | Feb 2021  | Beta           | 1551       | -             | Sep 2021                   | 686       | -            | 5                     |
| 149         | F   | 50-59 | Jul 2021  | Delta          | 211        | -             | Sep 2021                   | 935       | -            | 2                     |

**Table S7: Summary vaccinated participants (no advanced HIV disease)**

|                                        | <b>All (n=26)</b> | <b>HIV- (n=16)</b> | <b>PLWH (n=10)</b> |
|----------------------------------------|-------------------|--------------------|--------------------|
| Female                                 | 17 (65%)          | 11 (69%)           | 6 (60%)            |
| Age (median, IQR)                      |                   | 42.5 (31-63)       | 47 (41-55)         |
| <b>Infecting Variant by Date</b>       |                   |                    |                    |
| Ancestral                              | 16 (62%)          | 10 (63%)           | 6 (60%)            |
| Beta                                   | 6 (23%)           | 4 (25%)            | 2 (20%)            |
| Delta                                  | 4 (15%)           | 2 (13%)            | 2 (20%)            |
| Vacc. CD4 (median, IQR)                | 830.5 (686-1003)  | 948 (765-1184.5)   | 707.5 (464-815)    |
| Vacc. HIV VL (median, IQR)             | -                 | -                  | 40 (40-40)         |
| Last dose to sample (median, IQR days) | 24.5 (14-29)      | 27.5 (19-29.5)     | 15.5 (13-28)       |

**Table S8: Participants from different infection periods**

|                                        | <b>Delta*<br/>n=10</b> | <b>BA.1 unvaccinated<br/>n=24</b> | <b>BA.1 vaccinated<br/>n=15</b> | <b>XBB unvaccinated n=8</b> |
|----------------------------------------|------------------------|-----------------------------------|---------------------------------|-----------------------------|
| Female                                 | 2 (20%)                | 16 (67%)                          | 9 (60%)                         | 5 (63%)                     |
| Age (median, IQR)                      | 47 (41-56)             | 31.5 (26-49)                      | 37 (32-60)                      | 53 (37.5-67.5)              |
| CD4 (median, IQR)                      | 938 (671-1238)         | 772 (611-1055.5)                  | 679 (584-904)                   | 925 (723-1102)              |
| HIV Positive                           | 4 (40%)                | 8 (33%)                           | 4 (27%)                         | 2 (25%)                     |
| Diagnosis to sample (median, IQR days) | 23 (22-26)             | 21.5 (17-26.5)                    | 22 (17-23)                      | 13 (9-17)                   |
| Last dose to sample (median, IQR days) | 23 (21-31)             | -                                 | 168 (148-220)                   | -                           |

\*Two participants vaccinated with 1 dose BNT162b2. Delta enrollments from 01 June 2021-31 Oct 2021. Omicron BA.1 enrollments from 01 Nov 2021-28 Feb 2022. Omicron BA.4/5 enrollments from 01 Mar 2022-31 Oct 2022. Omicron XBB enrollments from 01 Nov 2022-01 Jun 2023.

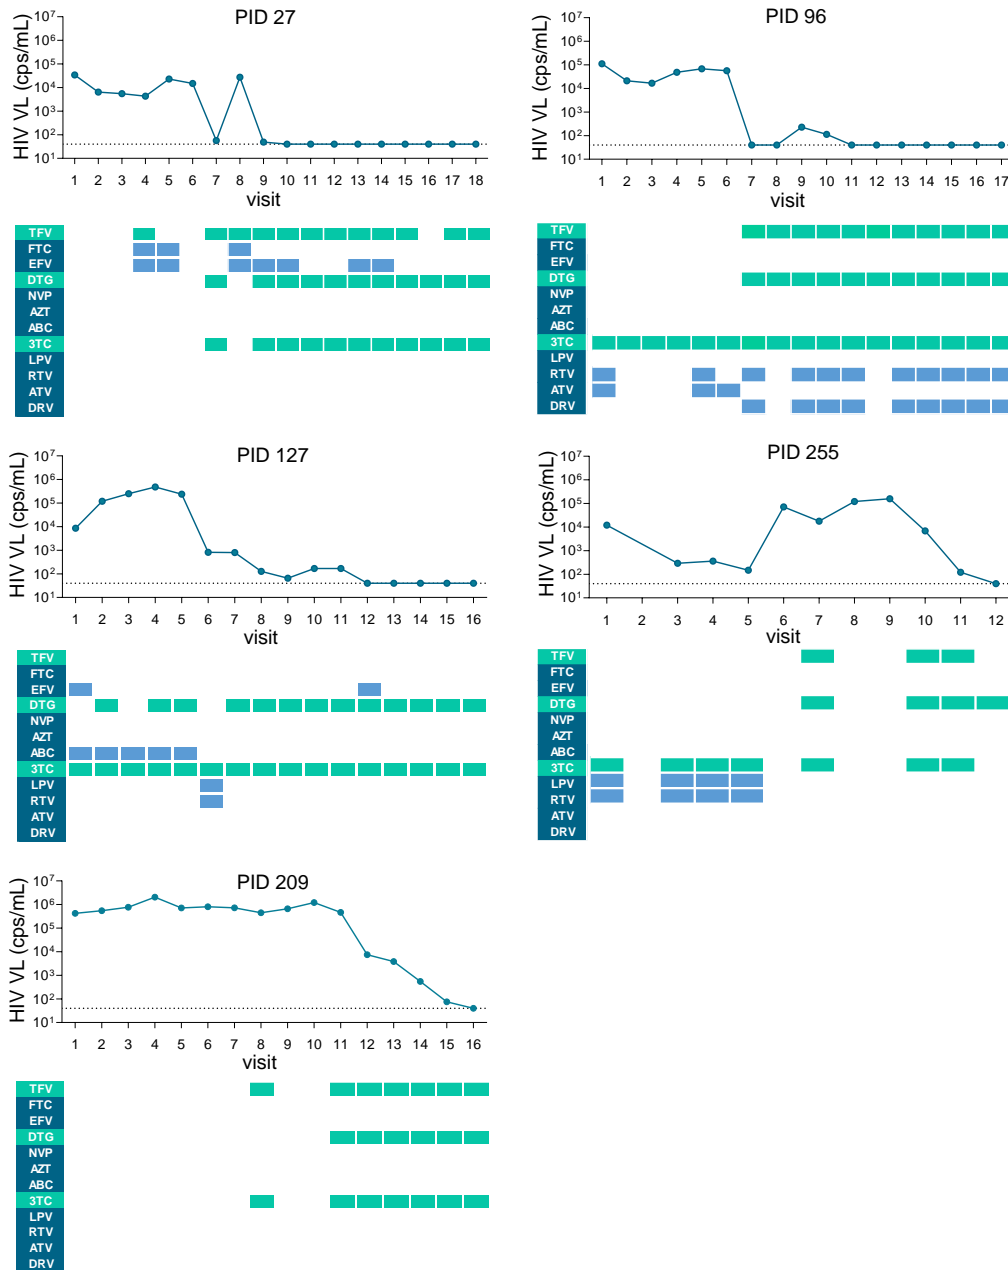

**Figure S1: Antiretroviral drugs detected in plasma samples from the 5 participants with advanced HIV disease.** ART components assayed by LC-MS/MS were the integrase inhibitor dolutegravir (DTG), the nucleotide reverse transcriptase inhibitor tenofovir (TFV), the nucleoside reverse transcriptase inhibitors emtricitabine (FTC), lamivudine (3TC), abacavir (ABC), and azidothymidine (AZT), the nonnucleoside reverse transcriptase inhibitors Efavirenz (EFV) and nevirapine (NVP), and the protease inhibitors lopinavir (LPV), ritonavir (RTV), atazanavir (ATV) and darunavir (DRV). X-axis is participant study visit and y-axis is HIV viral load as RNA copies/mL (above) or antiretroviral drug (below). Green or blue rectangles indicate the corresponding drug was detected at the timepoint at a level above 3 ng/mL, the limit of detection. Green rectangles indicate the presence of components of the regimen of TFV, 3TC, and DTG on which participants were initiated, and blue rectangles indicate components of other regimens.

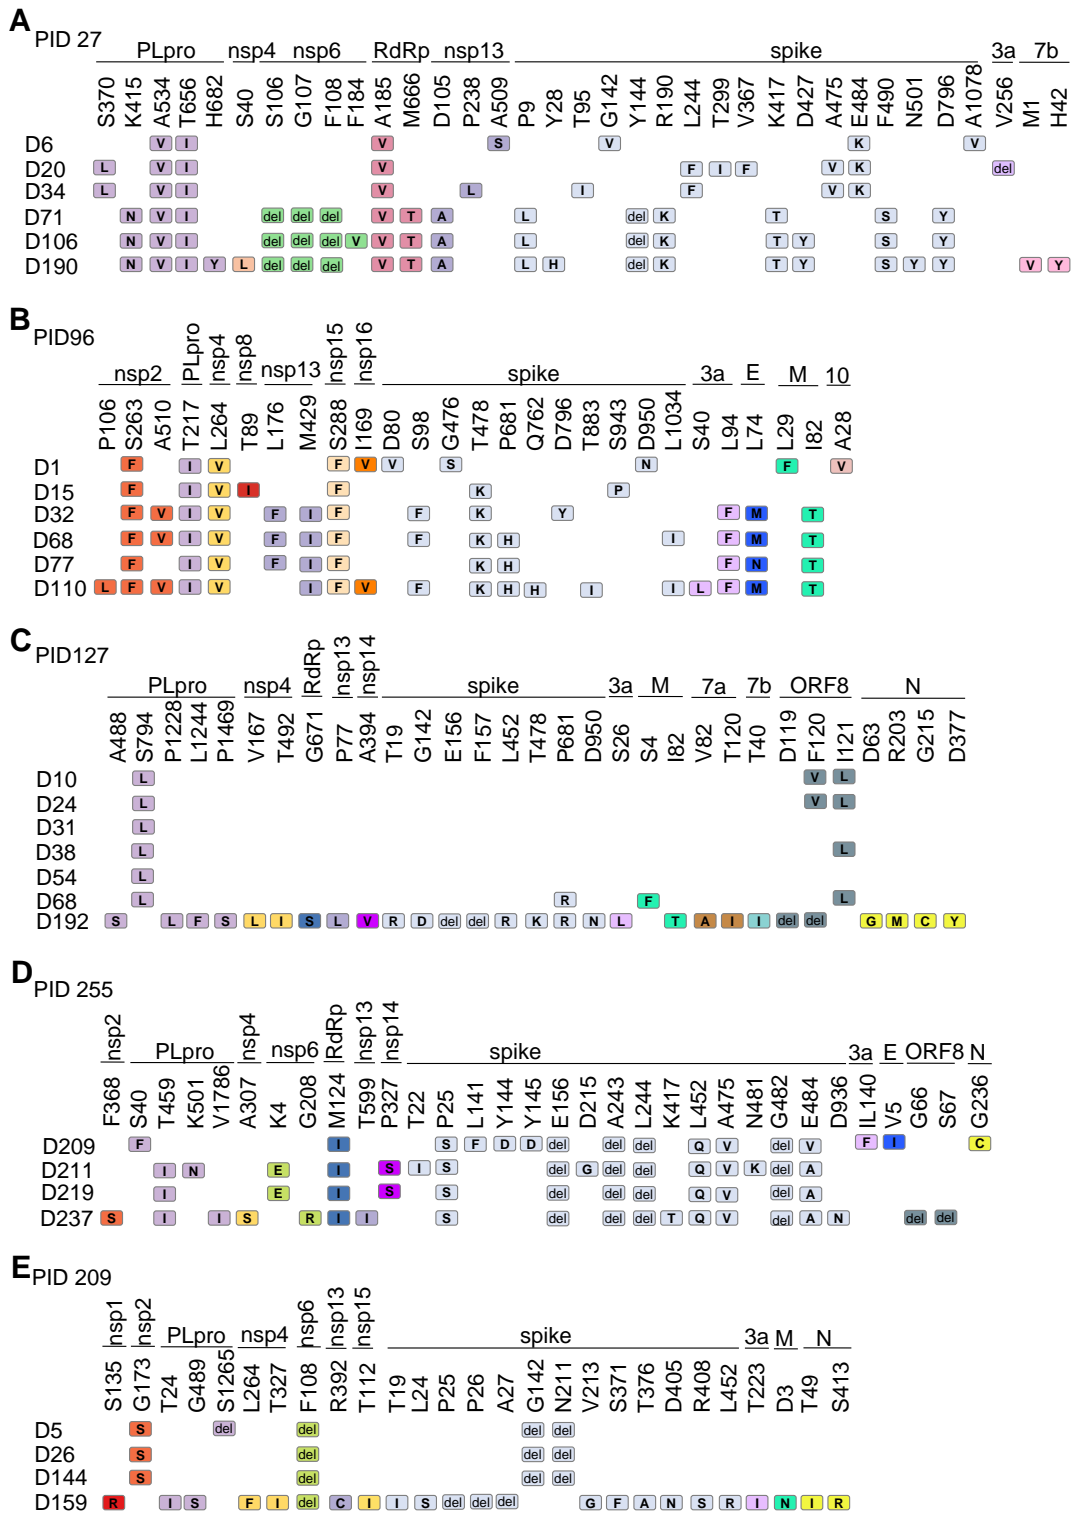

**Figure S2: Substitutions or deletions in SARS-CoV-2 sequences of advanced HIV disease participants through time.** Horizontal axis indicates the SARS-CoV-2 protein where substitution or deletion occurred relative to the infecting strain and vertical axis is the time post-diagnosis the viral isolate was obtained. Mutation calling in SARS-CoV-2 proteins is performed using the Stanford Coronavirus Antiviral and Resistance Database (<https://covdb.stanford.edu>).

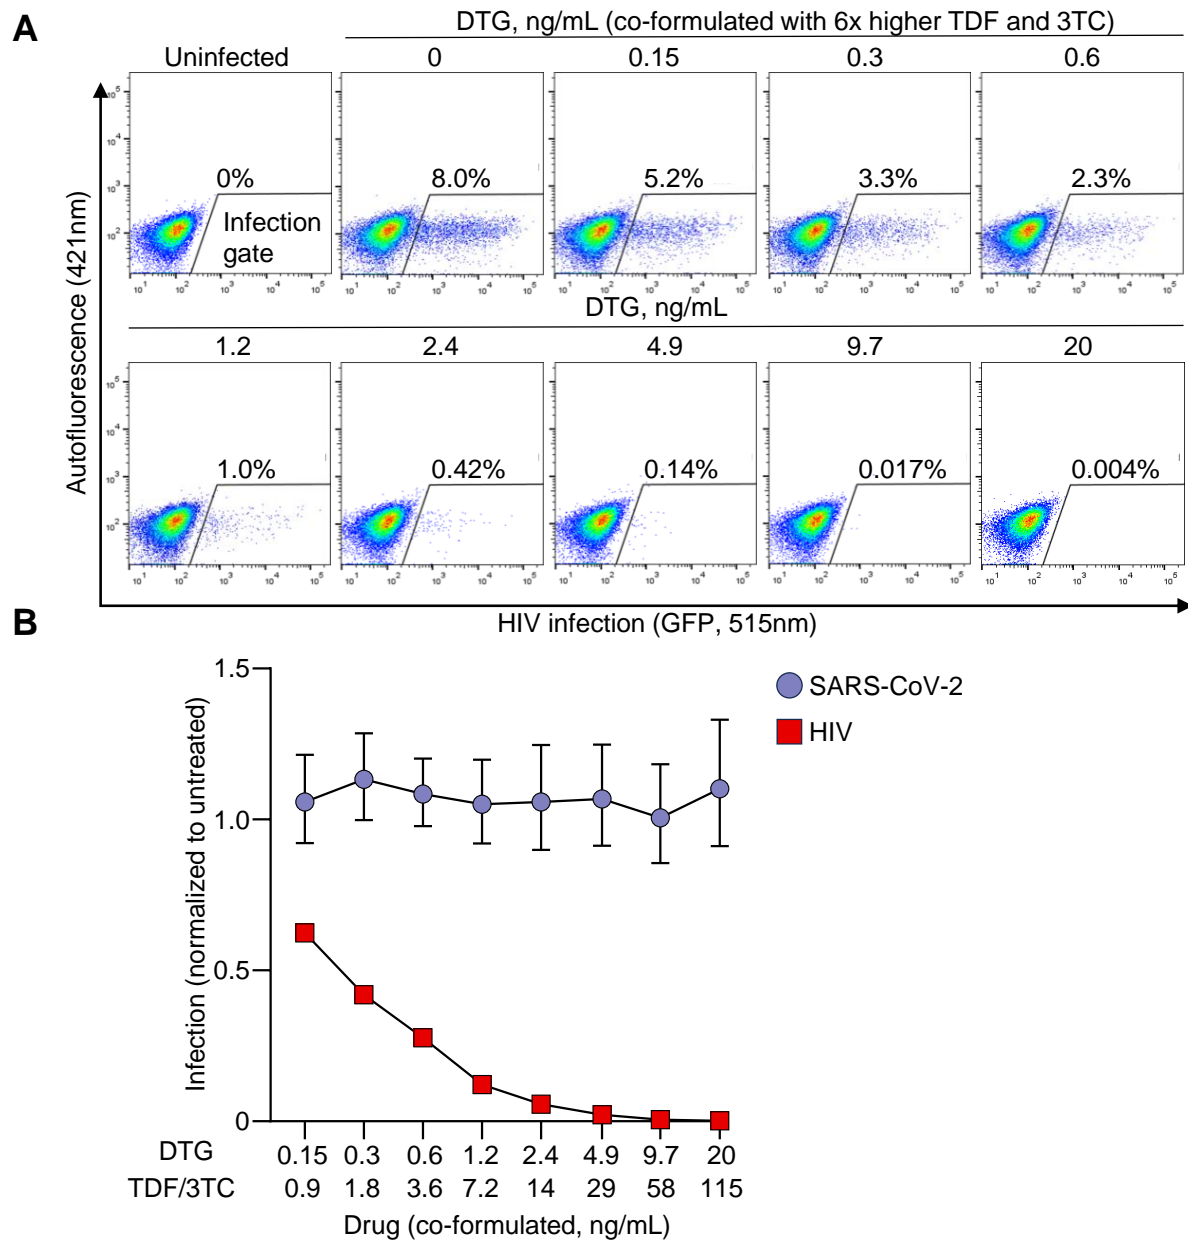

**Figure S3: Effect of co-formulated TLD ART regimen on HIV and SARS-CoV-2 infection.** A) RevCEM-GFP reporter cells were infected with NL4-3 HIV in the presence of co-formulated tenofovir disoproxil fumarate (TDF), lamivudine (3TC), dolutegravir (DTG), the TLD ART regimen. GFP positive infected cells were detected by flow cytometry in the indicated gate. DTG concentration indicated above each plot. TDF and 3TC levels were present at 6-fold higher concentrations relative to DTG. B) Fraction of HIV infected cells by flow cytometry and SARS-CoV-2 (ancestral D614G) infected foci by focus forming assay (see Materials and Methods) in the presence of the TLD regimen, normalized to infection in the absence of TLD. Shown are geometric means and geometric std from 6 (SARS-CoV-2) or 4 (HIV) replicates from two independent experiments.

Focus formation by 209-D5 virus

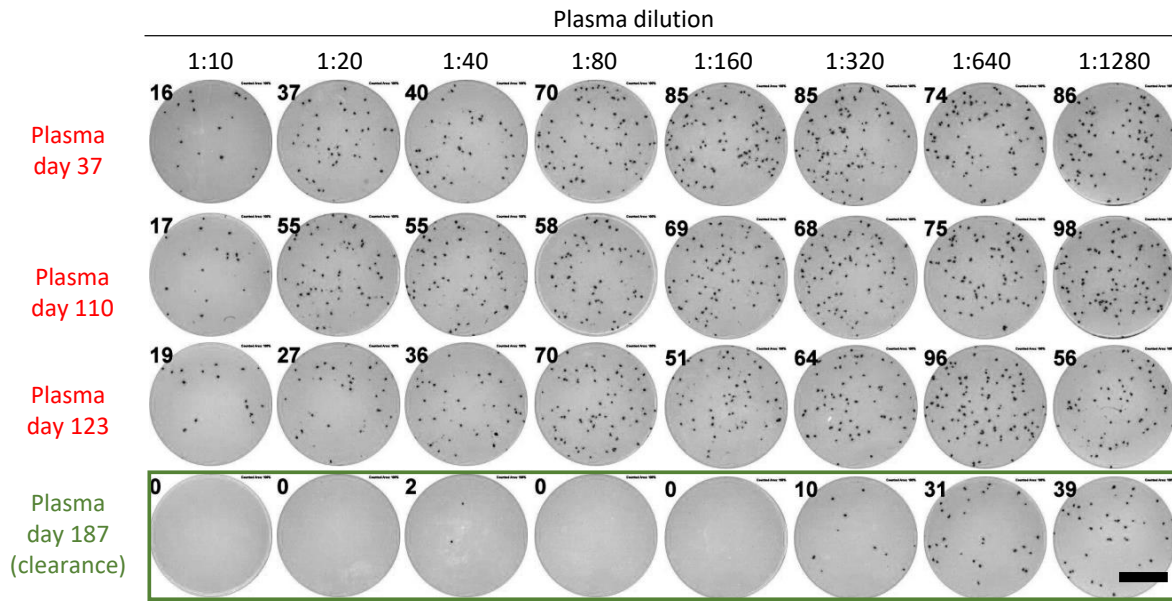

**Figure S4: Neutralizing antibody response of participant plasma against autologous out-grown virus at different timepoints.** Representative image showing infection foci in wells of a multi-well plate from a live virus focus forming assay of participant 209 plasma against autologous virus (209-D5). Plasma samples were from timepoints pre-SARS-CoV-2 clearance (D37, D110, D123) through to clearance (D187). Columns are plasma dilutions which range from 1:10 to 1:1280 and rows are plasma timepoint used. Bar is 2 mm.



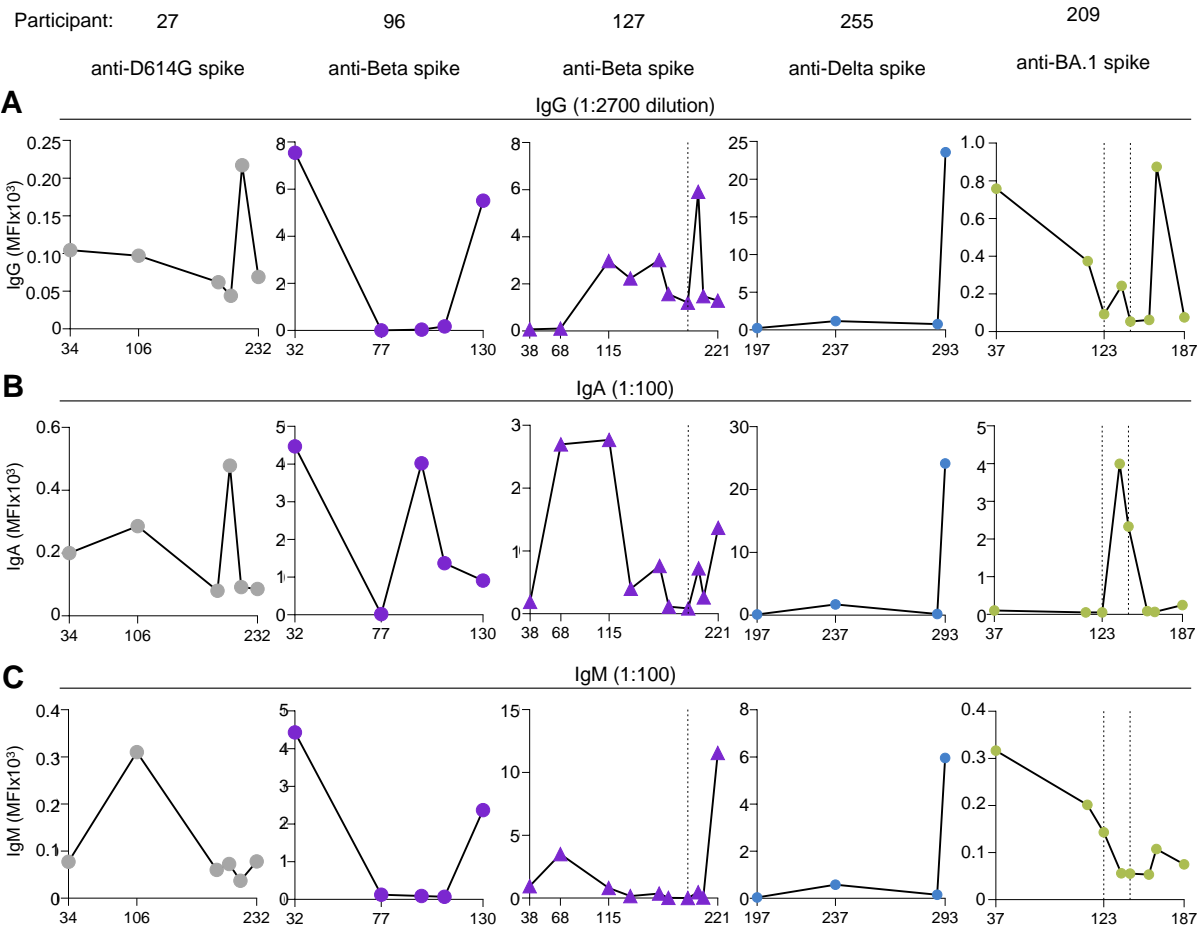

**Figure S5: Kinetics of antibody isotype responses in plasma over time in advanced HIV disease participants.** A) IgG responses to the spike matching the infecting variant, at a dilution of 1:2,700. B) IgM and C) IgA responses at a dilution of 1:100. Y-axis is mean fluorescence intensity (MFI)  $\times 10^3$ . X-axis is time in days post-SARS-CoV-2 diagnosis. One sample was analyzed per timepoint.

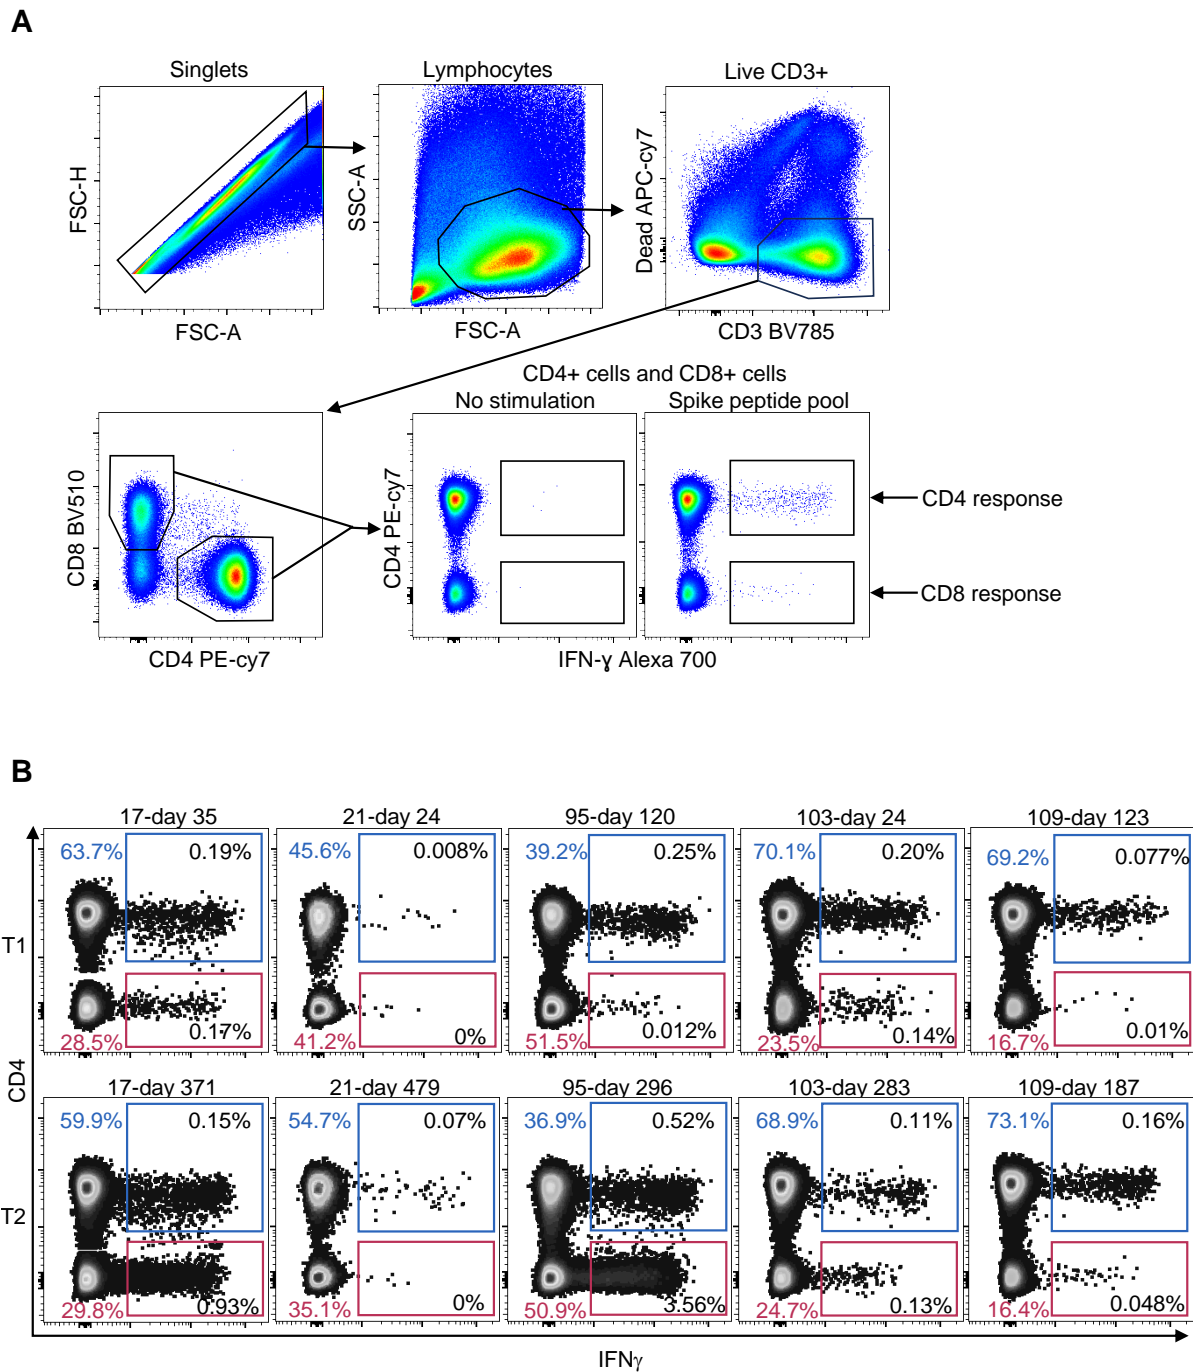

**Figure S6: Flow cytometry gating strategy and control participant responses.** A) Nested gating strategy to identify CD4+ and CD8+ T cell populations and IFN- $\gamma$  production in response to Spike SARS-CoV-2 peptide pool in the CD4 and CD8 compartments. B) Expression of IFN- $\gamma$  in CD4+ and CD8+ T cells upon stimulation with spike peptide pool in the five controls participants (17, 21, 95, 103 and 109) at two time points (top: Timepoint 1 was post-infection and pre-vaccination, and bottom: Timepoint 2 was post-vaccination). There was sufficient PBMC sample for one test per timepoint.
